# Supplementary material for: Oligomerization Reactions of Criegee Intermediates with Hydroxyalkyl Hydroperoxides: Mechanism, Kinetics, and Structure-Reactivity Relationship
Source: Copernicus journal article supplement (doi:10.5194/acp-2018-935), 2018-11-06
Supplement: Supplementary file [file acp-2018-935-AC2-supplement.pdf]

Prof. Yu Huang  
Key Lab of Aerosol Chemistry & Physics,  
Institute of Earth Environment, Chinese Academy  
of Sciences, Xi'an, 710061, China  
Tel./Fax: (86) 29-62336261  
E-mail: [huangyu@ieecas.cn](mailto:huangyu@ieecas.cn)

Jan. 31, 2019

Dear reviewer,

**Revision for Manuscript acp-2018-935**

We thank you very much for giving us the opportunity to revise our manuscript. We highly appreciate the reviewer for their comments and suggestions on the manuscript entitled “**Mechanistic and Kinetics Investigations of Oligomer Formation from Criegee Intermediates Reactions with Hydroxyalkyl Hydroperoxides**”. We have made revisions of our manuscript carefully according to the comments and suggestions of reviewer. The revised contents are marked in blue color. The response letter to reviewers is attached at the end of this cover letter.

We hope that the revised manuscript can meet the requirement of Atmospheric Chemistry & Physics. Any further modifications or revisions, please do not hesitate to contact us.

Look forward to hearing from you as soon as possible.

Best regards,

Yu Huang

## Comments of reviewer #2

1. First of all, I think that the title of this study goes too far. The main focus of this study refers just to the reaction of Carbonyl oxides with HHPs, although a second step, namely the mechanisms for the interaction of the products of these reaction with Carbonyl oxides is taken into account.

**Response:** The title of this study has been revised to “Mechanistic and Kinetics Investigations of Oligomer formation from Criegee Intermediates Reactions with Hydroxyalkyl Hydroperoxides”.

2. Along the text, the authors refer to several reaction products, as for instance, P2c, P2b and so on, but the structure of these compounds is not mentioned, which makes the work difficult to follow.

**Response:** Based on the Reviewer’s suggestion, the structures of all reactants and products are added in the revised manuscript and supplement figures.

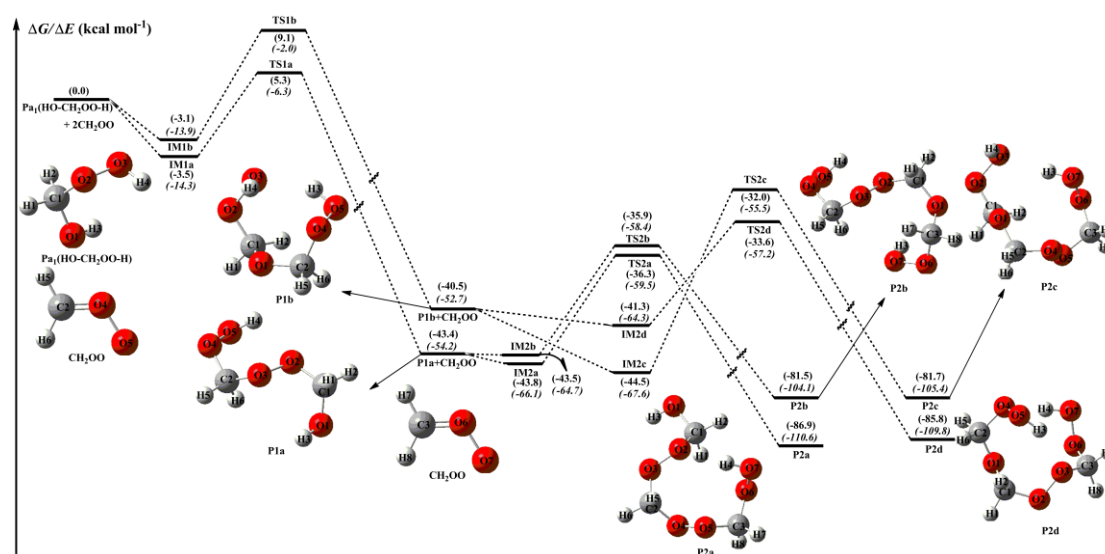

**Figure 2.** PES ( $\Delta G$  and  $\Delta E$  (italic)) for the reaction of  $\text{CH}_2\text{OO}$  with  $\text{HO-CH}_2\text{OO-H}$  ( $\text{Pa}_1$ ) computed at the M06-2X/def2-TZVP//M06-2X/6-311+G(2df,2p) level of theory

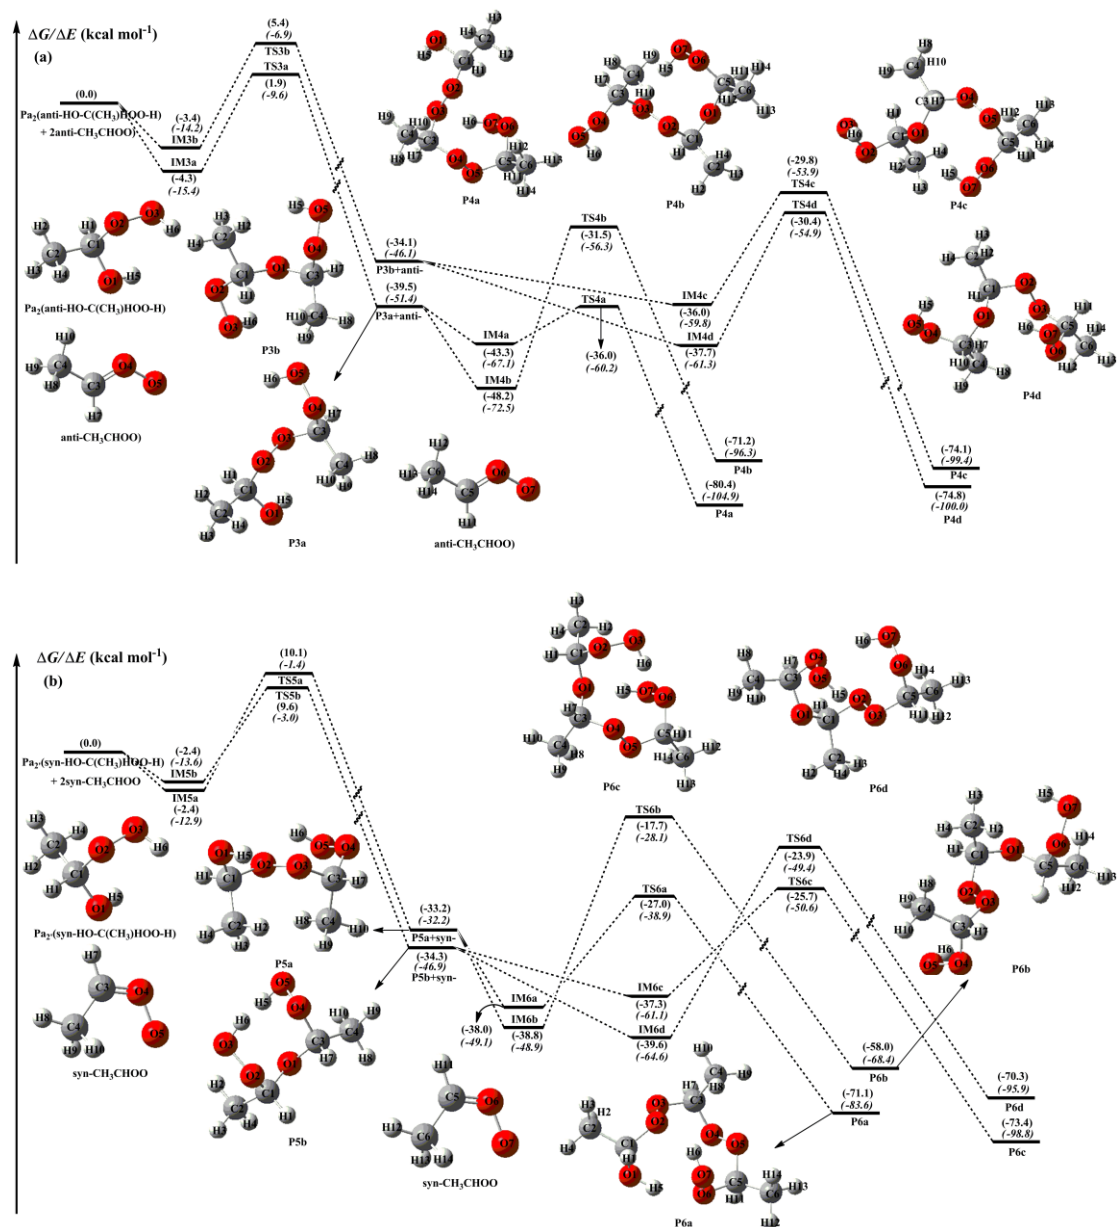

**Figure 3.** PES ( $\Delta G$  and  $\Delta E$  (italic)) for the reactions of  $\text{HO-C(CH}_3\text{)HOO-H}$  with anti-(a) and syn- $\text{CH}_3\text{CHOO}$ (b) calculated at the M06-2X/def2-TZVP//M06-2X/6-311+G(2df,2p) level of theory

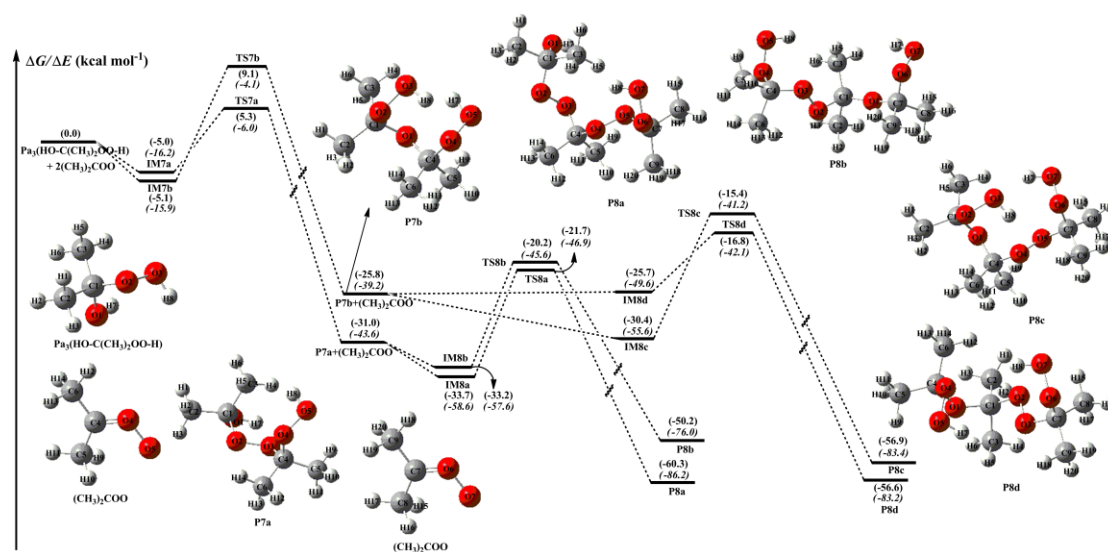

**Figure 4.** PES ( $\Delta G$  and  $\Delta E$  (italic)) for the reaction of  $(\text{CH}_3)_2\text{COO}$  with  $\text{HO-C}(\text{CH}_3)_2\text{OO-H}(\text{Pa}_3)$  calculated at the M06-2X/def2-TZVP//M06-2X/6-311+G(2df,2p) level of theory

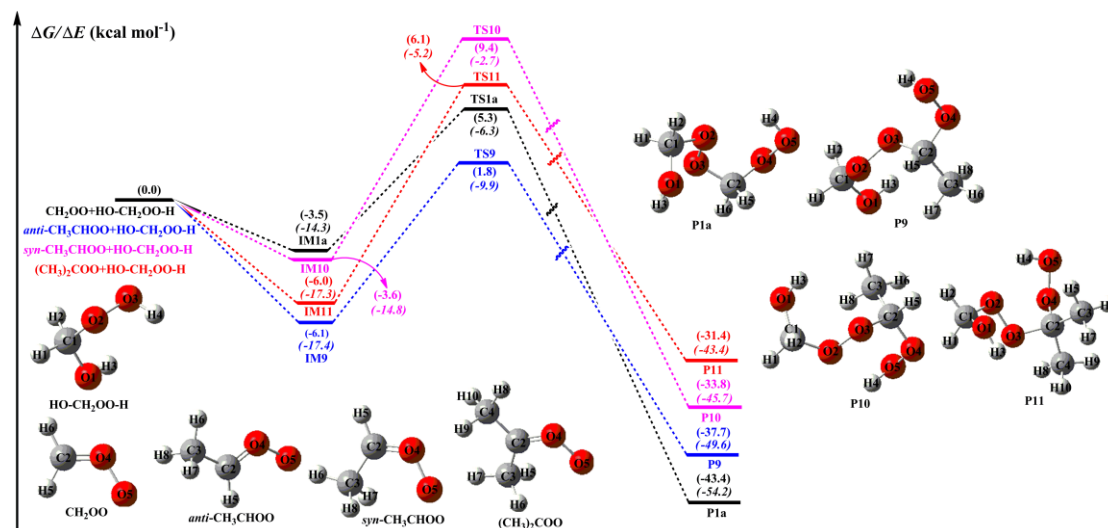

**Figure 5.** PES ( $\Delta G$  and  $\Delta E$  (italic)) of distinct SCI reactions with  $\text{HO-CH}_2\text{OO-H}(\text{Pa}_1)$  calculated at the M06-2X/def2-TZVP//M06-2X/6-311+G(2df,2p) level of theory

3. Some important references misses, as for instance CPL, 2001,337, 199, JPCA, 2001,105,446, JACS, 1997, 119, 330, CPC 2002, 2, 215, JPCA, 2003, 107, 5812, J. Atmos. Chem, 2000, 35, 165 and references therein.

**Response:** The references on the unimolecular decay of HHPs generated from isoprene ozonolysis, and OH radicals production from alkene ozonolysis are added in the Introduction of the revised manuscript. Thanks for suggesting these closely related references, which have now been cited in the revised manuscript.

The corresponding sentences have been added in the page 4 line 90-92, page 6 line 145-148 and page 3 line 57-61 of the revised manuscript in blue color:

Winterhalter et al. (2001) studied the mechanism and products of gas phase ozonolysis of  $\beta$ -pinene, and found that the main products are the excited C9-CI plus HCHO. Aplincourt et al. (2003) investigated the unimolecular decay and water-catalyzed decomposition of HHPs generated from isoprene ozonolysis, and found that the main products are methyl vinyl ketone (MVK) or methacroleine (MAC) plus  $H_2O_2$ . The thermal unimolecular decay of vibrationally excited CIs is thought to be an important nonphotolytic source of atmospheric hydroxyl (OH) radicals, particularly in low light conditions, urban environments, and heavily forested areas (Lester et al., 2018; Foreman et al., 2016; Kidwell et al., 2016; Green et al., 2017; Zhang et al., 2002; Cremer et al., 2001; Anglada et al., 2002).

4. Regarding the theoretical approach, the authors state that all stationary points have been computed using the M06-2X functional, and for some selected elementary reactions they have performed single point energy calculations at CCSD(T) level of theory, pointing out that the deviations in the free energy barriers computed with both approaches range between 1.5-1.6 kcal/mol. The authors should clarify in which cases they have computed the energy barriers using both approaches, if they have taken into account basis set superposition corrections. They should compare the results of both approaches, for instance with results from the literature involving the reaction with water vapor (section 3.1) with results from the literature, where energy barriers are reported at CCSD(T)/CBS level of theory.

**Response:** In the present study, the geometries of all stationary points on PES are optimized at the M06-2X/6-311+G(2df,2p) level of theory. For improved energies, single point calculations at the M06-2X/def2-TZVP level are performed. In order to evaluate the reliability of M06-2X functional in computing energies, the single point energies of species involved in the some selected elementary reactions (R1a-R1d, R3a-R3d and R5a-R5d) are recalculated at the CCSD(T)/6-311+G(2df,2p) level based on the M06-2X/6-311+G(2df,2p) optimized geometries. Furthermore, the basis set superposition error (BSSE) is performed using the counterpoise method proposed by Boys and Bernardi (Boys et al., 1970). The electronic-energy ( $\Delta E_a^\#$ ) and free-energy ( $\Delta G_a^\#$ ) barriers comparisons of both approaches for considering BSSE correction and not considering are listed in Table S1. As shown in Table S1, the BSSE correction contributes to the barriers  $\sim 1.4$  (CCSD(T)) and  $\sim 0.4$  (M06-2X) kcal mol<sup>-1</sup>, respectively. The mean absolute deviations (MAD) of both approaches are 0.98 ( $\Delta E_a^\#$ ) and 0.96 ( $\Delta G_a^\#$ ) kcal mol<sup>-1</sup> when without

considering BSSE correction, while they are 0.38 ( $\Delta E_a^\#$ ) and 0.34 ( $\Delta G_a^\#$ ) kcal mol<sup>-1</sup> when considering BSSE correction. The result shows that the M06-2X method in combination with the BSSE correction afford energies similar to those determined by the accurate and well recognized CCSD(T) level calculation. Considering the computational costs, the M06-2X/def2-TZVP method is selected to perform the single-point energy calculation for the title reaction system.

For the bimolecular reaction of carbonyl oxide with water dimer, the barriers ( $\Delta E_a^\#$  and  $\Delta G_a^\#$ ) are calculated using the M06-2X/def2-TZVP//M06-2X/6-311+G(2df,2p) method, and compared to the literature results. As shown in Table 1, the barrier differences between the computational and literature ones that were derived from the CCSD(T)/aug-cc-pVTZ//B3LYP/6-311+G(2df,2p) method (Anglada et al., 2016) are 0.5-1.0 kcal mol<sup>-1</sup>. Such discrepancies may be attributed to the different theoretical methods used in computing energies. The barrier of Entry 4 is 3.3 kcal mol<sup>-1</sup>, which is lower than the corresponding CCSD(T)/CBS result by 0.5 kcal mol<sup>-1</sup> (Anglada et al., 2016). The results show that the M06-2X method provides energies similar to those determined by the CCSD(T) level calculation.

Corresponding descriptions have been added in the page 8 line 198-215 and page 10 line 264-271 of the revised manuscript:

*In order to obtain a better evaluation on the reliability of M06-2X functional in computing energies, the single point energies of species included in some selected elementary reactions (R1a-R1d, R3a-R3d and R5a-R5d) are recalculated at the CCSD(T)/6-311+G(2df,2p) level based on the M06-2X/6-311+G(2df,2p) optimized geometries. Furthermore, the basis set superposition error (BSSE) is performed using the counterpoise method described by Boys and Bernardi (1970) to estimate the stability of the pre-reactive complexes. The electronic-energy ( $\Delta E_a^\#$ ) and free-energy ( $\Delta G_a^\#$ ) barriers comparisons of both approaches for considering BSSE correction and not considering are listed in Table S1. As shown in Table S1, the contributions of BSSE corrections to the barriers are ~ 1.4 (CCSD(T)) and ~ 0.4 (M06-2X) kcal mol<sup>-1</sup>, respectively. The mean absolute deviations (MAD) of both approaches are 0.98 ( $\Delta E_a^\#$ ) and 0.96 ( $\Delta G_a^\#$ ) kcal mol<sup>-1</sup> when without considering BSSE correction, while they become 0.38 ( $\Delta E_a^\#$ ) and 0.34 ( $\Delta G_a^\#$ ) kcal mol<sup>-1</sup> when considering BSSE correction. The result shows that the M06-2X method in combination with the BSSE correction afford energies similar to those determined by the accurate and well recognized CCSD(T) level calculation. Considering the computational costs, the*

M06-2X/def2-TZVP method is selected to perform the single-point energy calculation for the title reaction system.

As shown in Table 1, the barrier differences between the computational and literature ones that were derived from the CCSD(T)/aug-cc-pVTZ//B3LYP/6-311+G(2df,2p) method (Anglada et al., 2016) are 0.5-1.0 kcal mol<sup>-1</sup>. Such discrepancies may be attributed to the different theoretical method used in computing energies. The barrier of Entry 4 is 3.3 kcal mol<sup>-1</sup>, which is lower than the corresponding CCSD(T)/CBS result by 0.5 kcal mol<sup>-1</sup> (Anglada et al., 2016). The results show that the M06-2X method provides energies similar to those determined by the CCSD(T) level calculation.

**Table 1** Relative free-energies (kcal mol<sup>-1</sup>) for the stationary points and free-energy ( $\Delta G_a^\#$ ) barriers for the elementary pathways of distinct carbonyl oxides reactions with water dimer calculated at the M06-2X/def2-TZVP//M06-2X/6-311+G(2df,2p) level of theory. Labels A, B, C, and D are defined in Figure 1

| Entry | R1              | R2              | DO2H4O4H3 | DO4H2O3H1 | A          | B   | C     | D     | $\Delta G_a^\#$ |
|-------|-----------------|-----------------|-----------|-----------|------------|-----|-------|-------|-----------------|
| 1     | H               | H               | -123.6    | 96.7      | -2.5(-2.9) | 0.2 | -40.5 | -39.9 | 2.7<br>[2.2]    |
| 2     | H               | H               | 124.5     | -94.9     | -2.5(-3.0) | 0.2 | -39.6 | -40.2 | 2.7             |
| 3     | H               | H               | -143.8    | -116.9    | -2.2(-2.6) | 0.2 | -39.1 | -40.2 | 2.4             |
| 4     | H               | H               | 143.0     | 122.7     | -1.9(-2.3) | 1.4 | -40.0 | -40.3 | 3.3<br>{3.8}    |
| 5     | CH <sub>3</sub> | H               | -126.2    | 100.9     | -2.5(-3.0) | 4.1 | -32.4 | -31.9 | 6.6<br>[6.0]    |
| 6     | CH <sub>3</sub> | H               | 130.0     | -90.4     | -2.0(-2.5) | 4.3 | -31.6 | -32.2 | 6.3             |
| 7     | CH <sub>3</sub> | H               | -146.0    | -116.3    | -2.1(-2.6) | 4.1 | -30.9 | -32.2 | 6.2             |
| 8     | CH <sub>3</sub> | H               | 138.1     | 126.3     | -2.3(-2.8) | 4.7 | -31.7 | -31.9 | 7.0             |
| 9     | H               | CH <sub>3</sub> | -122.1    | 95.0      | -4.3(-4.8) | 0.6 | -36.6 | -36.2 | 4.9<br>[3.9]    |
| 10    | H               | CH <sub>3</sub> | 125.6     | -93.6     | -3.9(-4.3) | 0.7 | -35.7 | -36.5 | 4.6             |
| 11    | H               | CH <sub>3</sub> | -138.1    | -120.5    | -4.4(-4.9) | 1.1 | -34.9 | -36.5 | 5.5             |
| 12    | H               | CH <sub>3</sub> | 139.2     | 123.4     | -3.6(-4.1) | 2.0 | -36.0 | -36.2 | 5.6             |
| 13    | CH <sub>3</sub> | CH <sub>3</sub> | -125.4    | 101.5     | -4.6(-5.1) | 4.2 | -29.7 | -29.1 | 8.8<br>[7.8]    |
| 14    | CH <sub>3</sub> | CH <sub>3</sub> | 128.5     | -89.8     | -4.2(-4.8) | 4.5 | -28.6 | -29.7 | 8.7             |
| 15    | CH <sub>3</sub> | CH <sub>3</sub> | -145.4    | -117.6    | -4.9(-5.3) | 4.6 | -28.2 | -29.7 | 9.5             |
| 16    | CH <sub>3</sub> | CH <sub>3</sub> | 136.3     | 129.4     | -4.5(-5.0) | 5.2 | -29.2 | -29.1 | 9.7             |

Values in parenthesis correspond to without considering the BSSE correction, values in brackets correspond to CCSD(T)/aug-cc-pVTZ//B3LYP/6-311+G(2df,2p), values in braces correspond to CCSD(T)/CBS//B3LYP/6-311+G(2df,2p)

**Table S1** Y/X (Y = M06-2X, CCSD(T), X = 6-311+G(2df,2p), def2-TZVP) calculated energy

barrier( $\Delta E_a^\#$ ,  $\Delta G_a^\#$ ) for the addition reactions of carbonyl oxides with HHPs based on the M06-2X/6-311+G(2df,2p) optimized geometries (kcal mol<sup>-1</sup>)

| Reactions | CCSD(T)/6-311+G(2df,2p)               |                                       | M06-2X/def2-TZVP                      |                                       |
|-----------|---------------------------------------|---------------------------------------|---------------------------------------|---------------------------------------|
|           | $\Delta E_a^\#$                       | $\Delta G_a^\#$                       | $\Delta E_a^\#$                       | $\Delta G_a^\#$                       |
| R1a       | 9.4 <sup>a</sup> ; 7.9 <sup>b</sup>   | 10.1 <sup>a</sup> ; 8.6 <sup>b</sup>  | 8.0 <sup>a</sup> ; 7.6 <sup>b</sup>   | 8.8 <sup>a</sup> ; 8.4 <sup>b</sup>   |
| R1b       | 13.0 <sup>a</sup> ; 11.6 <sup>b</sup> | 13.3 <sup>a</sup> ; 11.9 <sup>b</sup> | 11.9 <sup>a</sup> ; 11.4 <sup>b</sup> | 12.2 <sup>a</sup> ; 11.7 <sup>b</sup> |
| R1c       | 8.1 <sup>a</sup> ; 6.7 <sup>b</sup>   | 9.2 <sup>a</sup> ; 7.8 <sup>b</sup>   | 6.9 <sup>a</sup> ; 6.4 <sup>b</sup>   | 7.9 <sup>a</sup> ; 7.4 <sup>b</sup>   |
| R1d       | 8.6 <sup>a</sup> ; 7.6 <sup>b</sup>   | 10.2 <sup>a</sup> ; 9.2 <sup>b</sup>  | 7.0 <sup>a</sup> ; 6.7 <sup>b</sup>   | 8.7 <sup>a</sup> ; 8.4 <sup>b</sup>   |
| R3a       | 6.6 <sup>a</sup> ; 4.9 <sup>b</sup>   | 7.1 <sup>a</sup> ; 5.4 <sup>b</sup>   | 5.8 <sup>a</sup> ; 4.4 <sup>b</sup>   | 6.2 <sup>a</sup> ; 5.8 <sup>b</sup>   |
| R3b       | 8.4 <sup>a</sup> ; 7.3 <sup>b</sup>   | 9.7 <sup>a</sup> ; 8.6 <sup>b</sup>   | 7.3 <sup>a</sup> ; 6.8 <sup>b</sup>   | 8.8 <sup>a</sup> ; 8.3 <sup>b</sup>   |
| R3c       | 6.5 <sup>a</sup> ; 4.8 <sup>b</sup>   | 7.3 <sup>a</sup> ; 5.6 <sup>b</sup>   | 5.8 <sup>a</sup> ; 5.4 <sup>b</sup>   | 6.6 <sup>a</sup> ; 6.2 <sup>b</sup>   |
| R3d       | 8.4 <sup>a</sup> ; 6.8 <sup>b</sup>   | 9.7 <sup>a</sup> ; 8.1 <sup>b</sup>   | 7.3 <sup>a</sup> ; 6.8 <sup>b</sup>   | 8.6 <sup>a</sup> ; 8.1 <sup>b</sup>   |
| R5a       | 12.3 <sup>a</sup> ; 10.9 <sup>b</sup> | 13.2 <sup>a</sup> ; 11.8 <sup>b</sup> | 11.5 <sup>a</sup> ; 11.1 <sup>b</sup> | 12.5 <sup>a</sup> ; 12.1 <sup>b</sup> |
| R5b       | 11.0 <sup>a</sup> ; 9.4 <sup>b</sup>  | 12.4 <sup>a</sup> ; 10.8 <sup>b</sup> | 10.6 <sup>a</sup> ; 10.1 <sup>b</sup> | 12.0 <sup>a</sup> ; 11.5 <sup>b</sup> |
| R5c       | 12.0 <sup>a</sup> ; 10.6 <sup>b</sup> | 13.3 <sup>a</sup> ; 11.9 <sup>b</sup> | 11.3 <sup>a</sup> ; 10.9 <sup>b</sup> | 12.5 <sup>a</sup> ; 12.1 <sup>b</sup> |
| R5d       | 12.2 <sup>a</sup> ; 11.0 <sup>b</sup> | 13.8 <sup>a</sup> ; 12.6 <sup>b</sup> | 11.4 <sup>a</sup> ; 11.0 <sup>b</sup> | 13.0 <sup>a</sup> ; 12.6 <sup>b</sup> |

*a and b represent without and with considering the BSSE correction*

5. Regarding the kinetics, the authors should clarify if they have considered the pre-reactive complexes in the kinetic study and if they play a role in the temperature dependence of the rate constants.

**Response:** As shown in Figure 5, the CH<sub>2</sub>OO + HO-CH<sub>2</sub>OO-H (Pa<sub>1</sub>) reaction proceeds according to a two-step mechanism: (i) a fast thermal equilibrium between the reactants and intermediate IM1a, (ii) the addition of CH<sub>2</sub>OO leading to the formation of product P1a. The whole reaction process is expressed as follows:

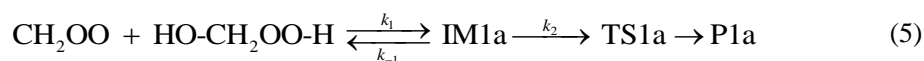

Applying the steady state approximation (SSA) for the intermediate IM1a, the overall rate coefficient is extrapolated to the eqn (6): (Zhang et al., 2012; Liu et al., 2015)

$$k_{\text{ovr}} = \frac{k_1 \times k_2}{k_{-1} + k_2} \quad (6)$$

If  $k_2 \ll k_{-1}$ , the overall rate coefficient is written as follows: (Ryzhkov et al., 2006; Chen et al., 2016)

$$k_{\text{ovr}} = \frac{k_1 \times k_2}{k_{-1} + k_2} \approx \frac{k_1}{k_{-1}} k_2 = K_{\text{eq}} k_2 \quad (7)$$

The equilibrium coefficient  $K_{\text{eq}}$  is expressed as eqn (8):



$$K_{\text{eq}} = \sigma \frac{Q_{\text{IM}}(T)}{Q_{\text{A}}(T)Q_{\text{B}}(T)} \exp\left(\frac{G_{\text{R}} - G_{\text{IM}}}{RT}\right) \quad (8)$$

where  $\sigma$  is reaction symmetry number,  $Q_{\text{IM}}(T)$ ,  $Q_{\text{A}}(T)$  and  $Q_{\text{B}}(T)$  denote the products of electronic, translational, rotational, torsional, and vibrational canonical partition functions for the intermediate, reactants A and B, respectively (Mendes, et al., 2014), T is the temperature in Kelvin,  $G_{\text{R}}$  and  $G_{\text{IM}}$  are the total free-energies of the reactant and intermediate, respectively.

Table R1 lists the partition functions, equilibrium coefficients ( $K_{\text{eq}}$ ), and rate coefficients ( $k_{2(\text{IM1a-TS1a})}$  and  $k_{\text{ovr}(\text{R1a})}$ ) of the bimolecular reaction of  $\text{CH}_2\text{OO}$  with  $\text{HO-CH}_2\text{OO-H}$  ( $\text{Pa}_1$ ). As shown the Table R1, the partition functions of reactants and intermediate increase with raising temperature, whereas the  $k_{\text{ovr}(\text{R1a})}$ ,  $K_{\text{eq}}$  and  $k_{2(\text{IM1a-TS1a})}$  decrease with increasing temperature, indicating that there is not a direct correlation between  $k_{\text{ovr}(\text{R1a})}$  and partition function of pre-reactive intermediate. The result shows that the kinetics parameters strongly depend on the interaction between  $K_{\text{eq}}$  and  $k_{2(\text{IM1a-TS1a})}$ . Similar conclusions are also obtained from those of the *anti*- $\text{CH}_3\text{CHOO} + \text{HO-CH}_2\text{OO-H}$ (R9), *syn*- $\text{CH}_3\text{CHOO} + \text{HO-CH}_2\text{OO-H}$ (R10) and  $(\text{CH}_3)_2\text{CHOO} + \text{HO-CH}_2\text{OO-H}$ (R11) systems (Table R2-R4).

**Table R1** The partition function, equilibrium coefficient ( $K_{\text{eq}}$ ) ( $\text{cm}^3 \text{ molecule}^{-1}$ ), and rate coefficients ( $k_{2(\text{IM1a-TS1a})}$  and  $k_{\text{ovr}(\text{R1a})}$ ) ( $\text{cm}^3 \text{ molecule}^{-1} \text{ s}^{-1}$ ) of  $\text{CH}_2\text{OO}$  reactions with  $\text{HO-CH}_2\text{OO-H}$  ( $\text{Pa}_1$ ) computed at different temperatures

| T/K | $Q_{\text{CH}_2\text{OO}}$ | $Q_{\text{HOCH}_2\text{OOH}}$ | $Q_{\text{IMa}}$     | $K_{\text{eq}}$      | $k_{2(\text{IM1a-TS1a})}$ | $k_{\text{ovr}(\text{R1a})}$ |
|-----|----------------------------|-------------------------------|----------------------|----------------------|---------------------------|------------------------------|
| 273 | $7.9 \times 10^{10}$       | $1.6 \times 10^{12}$          | $1.1 \times 10^{15}$ | $2.8 \times 10^{-6}$ | $4.3 \times 10^{-6}$      | $1.2 \times 10^{-11}$        |
| 280 | $8.8 \times 10^{10}$       | $1.9 \times 10^{12}$          | $1.5 \times 10^{15}$ | $2.4 \times 10^{-6}$ | $4.0 \times 10^{-6}$      | $9.4 \times 10^{-12}$        |
| 298 | $1.2 \times 10^{11}$       | $2.7 \times 10^{12}$          | $2.7 \times 10^{15}$ | $1.6 \times 10^{-6}$ | $3.3 \times 10^{-6}$      | $5.4 \times 10^{-12}$        |
| 300 | $1.2 \times 10^{11}$       | $2.8 \times 10^{12}$          | $2.9 \times 10^{15}$ | $1.6 \times 10^{-6}$ | $3.2 \times 10^{-6}$      | $5.1 \times 10^{-12}$        |
| 320 | $1.6 \times 10^{11}$       | $4.2 \times 10^{12}$          | $5.6 \times 10^{15}$ | $1.1 \times 10^{-6}$ | $2.7 \times 10^{-6}$      | $3.0 \times 10^{-12}$        |
| 340 | $2.1 \times 10^{11}$       | $6.2 \times 10^{12}$          | $1.1 \times 10^{16}$ | $8.1 \times 10^{-7}$ | $2.3 \times 10^{-6}$      | $1.9 \times 10^{-12}$        |
| 360 | $2.7 \times 10^{11}$       | $9.0 \times 10^{12}$          | $2.0 \times 10^{16}$ | $6.2 \times 10^{-7}$ | $2.0 \times 10^{-6}$      | $1.2 \times 10^{-12}$        |
| 380 | $3.5 \times 10^{11}$       | $1.3 \times 10^{13}$          | $3.6 \times 10^{16}$ | $4.8 \times 10^{-7}$ | $1.8 \times 10^{-6}$      | $8.6 \times 10^{-13}$        |
| 400 | $4.5 \times 10^{11}$       | $1.8 \times 10^{13}$          | $6.6 \times 10^{16}$ | $3.9 \times 10^{-7}$ | $1.6 \times 10^{-6}$      | $6.3 \times 10^{-13}$        |

**Table R2** The partition function, equilibrium coefficient ( $K_{\text{eq}}$ ) ( $\text{cm}^3 \text{ molecule}^{-1}$ ), and rate coefficients ( $k_{2(\text{IM9-TS9})}$  and  $k_{\text{ovr}(\text{R9})}$ ) ( $\text{cm}^3 \text{ molecule}^{-1} \text{ s}^{-1}$ ) of *anti*- $\text{CH}_3\text{CHOO}$  reactions with  $\text{HO-CH}_2\text{OO-H}$  ( $\text{Pa}_1$ ) computed at different temperatures

| T/K | $Q_{\text{anti-CH}_3\text{CHOO}}$ | $Q_{\text{HOCH}_2\text{OOH}}$ | $Q_{\text{IM9}}$     | $K_{\text{eq}}$      | $k_{2(\text{IM9-TS9})}$ | $k_{\text{ovr}(\text{R9})}$ |
|-----|-----------------------------------|-------------------------------|----------------------|----------------------|-------------------------|-----------------------------|
| 273 | $1.4 \times 10^{12}$              | $1.6 \times 10^{12}$          | $9.1 \times 10^{15}$ | $1.3 \times 10^{-4}$ | $4.4 \times 10^{-5}$    | $5.5 \times 10^{-9}$        |
| 280 | $1.6 \times 10^{12}$              | $1.9 \times 10^{12}$          | $1.2 \times 10^{16}$ | $9.6 \times 10^{-5}$ | $3.9 \times 10^{-5}$    | $3.7 \times 10^{-9}$        |
| 298 | $2.4 \times 10^{12}$              | $2.7 \times 10^{12}$          | $2.5 \times 10^{16}$ | $5.0 \times 10^{-5}$ | $2.9 \times 10^{-5}$    | $1.5 \times 10^{-9}$        |

|     |                      |                      |                      |                      |                      |                       |
|-----|----------------------|----------------------|----------------------|----------------------|----------------------|-----------------------|
| 300 | $2.5 \times 10^{12}$ | $2.8 \times 10^{12}$ | $2.7 \times 10^{16}$ | $4.7 \times 10^{-5}$ | $2.9 \times 10^{-5}$ | $1.3 \times 10^{-9}$  |
| 320 | $3.7 \times 10^{12}$ | $4.2 \times 10^{12}$ | $5.8 \times 10^{16}$ | $2.5 \times 10^{-5}$ | $2.2 \times 10^{-5}$ | $5.5 \times 10^{-10}$ |
| 340 | $5.4 \times 10^{12}$ | $6.2 \times 10^{12}$ | $1.2 \times 10^{17}$ | $1.5 \times 10^{-5}$ | $1.7 \times 10^{-5}$ | $2.6 \times 10^{-10}$ |
| 360 | $7.8 \times 10^{12}$ | $9.0 \times 10^{12}$ | $2.5 \times 10^{17}$ | $9.1 \times 10^{-6}$ | $1.4 \times 10^{-5}$ | $1.3 \times 10^{-10}$ |
| 380 | $1.1 \times 10^{13}$ | $1.3 \times 10^{13}$ | $5.1 \times 10^{17}$ | $5.9 \times 10^{-6}$ | $1.2 \times 10^{-5}$ | $7.1 \times 10^{-11}$ |
| 400 | $1.6 \times 10^{13}$ | $1.8 \times 10^{13}$ | $1.0 \times 10^{18}$ | $4.1 \times 10^{-6}$ | $1.0 \times 10^{-5}$ | $4.1 \times 10^{-11}$ |

**Table R3** The partition function, equilibrium coefficient ( $K_{eq}$ ) ( $\text{cm}^3 \text{ molecule}^{-1}$ ), and rate coefficients ( $k_{2(\text{IM10-TS10})}$  and  $k_{\text{ovr}(\text{R10})}$ ) ( $\text{cm}^3 \text{ molecule}^{-1} \text{ s}^{-1}$ ) of *syn*-CH<sub>3</sub>CHOO reactions with HO-CH<sub>2</sub>OO-H (Pa<sub>1</sub>) computed at different temperatures

| T/K | $Q_{\text{syn-CH}_3\text{CHOO}}$ | $Q_{\text{HOCH}_2\text{OOH}}$ | $Q_{\text{IM10}}$    | $K_{eq}$             | $k_{2(\text{IM10-TS10})}$ | $k_{\text{ovr}(\text{R10})}$ |
|-----|----------------------------------|-------------------------------|----------------------|----------------------|---------------------------|------------------------------|
| 273 | $1.0 \times 10^{12}$             | $1.6 \times 10^{12}$          | $6.6 \times 10^{15}$ | $1.5 \times 10^{-6}$ | $5.6 \times 10^{-9}$      | $8.1 \times 10^{-15}$        |
| 280 | $1.2 \times 10^{12}$             | $1.9 \times 10^{12}$          | $8.8 \times 10^{15}$ | $1.2 \times 10^{-6}$ | $6.0 \times 10^{-9}$      | $7.5 \times 10^{-15}$        |
| 298 | $1.7 \times 10^{12}$             | $2.7 \times 10^{12}$          | $1.8 \times 10^{16}$ | $8.6 \times 10^{-7}$ | $7.3 \times 10^{-9}$      | $6.3 \times 10^{-15}$        |
| 300 | $1.8 \times 10^{12}$             | $2.8 \times 10^{12}$          | $1.9 \times 10^{16}$ | $8.3 \times 10^{-7}$ | $7.5 \times 10^{-9}$      | $6.2 \times 10^{-15}$        |
| 320 | $2.6 \times 10^{12}$             | $4.2 \times 10^{12}$          | $4.1 \times 10^{16}$ | $5.8 \times 10^{-7}$ | $9.1 \times 10^{-9}$      | $5.3 \times 10^{-15}$        |
| 340 | $3.7 \times 10^{12}$             | $6.2 \times 10^{12}$          | $8.7 \times 10^{16}$ | $4.3 \times 10^{-7}$ | $1.1 \times 10^{-8}$      | $4.6 \times 10^{-15}$        |
| 360 | $5.3 \times 10^{12}$             | $9.0 \times 10^{12}$          | $1.8 \times 10^{17}$ | $3.3 \times 10^{-7}$ | $1.3 \times 10^{-8}$      | $4.1 \times 10^{-15}$        |
| 380 | $7.5 \times 10^{12}$             | $1.3 \times 10^{13}$          | $3.6 \times 10^{17}$ | $2.6 \times 10^{-7}$ | $1.5 \times 10^{-8}$      | $3.8 \times 10^{-15}$        |
| 400 | $1.1 \times 10^{13}$             | $1.8 \times 10^{13}$          | $7.2 \times 10^{17}$ | $2.1 \times 10^{-7}$ | $1.7 \times 10^{-8}$      | $3.5 \times 10^{-15}$        |

**Table R4** The partition function, equilibrium coefficient ( $K_{eq}$ ) ( $\text{cm}^3 \text{ molecule}^{-1}$ ), and rate coefficients ( $k_{2(\text{IM11-TS11})}$  and  $k_{\text{ovr}(\text{R11})}$ ) ( $\text{cm}^3 \text{ molecule}^{-1} \text{ s}^{-1}$ ) of (CH<sub>3</sub>)<sub>2</sub>CHOO reactions with HO-CH<sub>2</sub>OO-H (Pa<sub>1</sub>) computed at different temperatures

| T/K | $Q_{(\text{CH}_3)_2\text{CHOO}}$ | $Q_{\text{HOCH}_2\text{OOH}}$ | $Q_{\text{IM11}}$    | $K_{eq}$             | $k_{2(\text{IM10-TS10})}$ | $k_{\text{ovr}(\text{R10})}$ |
|-----|----------------------------------|-------------------------------|----------------------|----------------------|---------------------------|------------------------------|
| 273 | $7.2 \times 10^{12}$             | $1.6 \times 10^{12}$          | $4.0 \times 10^{16}$ | $8.8 \times 10^{-5}$ | $3.1 \times 10^{-8}$      | $2.7 \times 10^{-12}$        |
| 280 | $8.5 \times 10^{12}$             | $1.9 \times 10^{12}$          | $5.5 \times 10^{16}$ | $6.9 \times 10^{-5}$ | $3.4 \times 10^{-8}$      | $2.3 \times 10^{-12}$        |
| 298 | $1.3 \times 10^{13}$             | $2.7 \times 10^{12}$          | $1.2 \times 10^{17}$ | $3.7 \times 10^{-5}$ | $4.1 \times 10^{-8}$      | $1.5 \times 10^{-12}$        |
| 300 | $1.4 \times 10^{13}$             | $2.8 \times 10^{12}$          | $1.3 \times 10^{17}$ | $3.5 \times 10^{-5}$ | $4.2 \times 10^{-8}$      | $1.5 \times 10^{-12}$        |
| 320 | $2.2 \times 10^{13}$             | $4.2 \times 10^{12}$          | $3.2 \times 10^{17}$ | $1.9 \times 10^{-5}$ | $5.2 \times 10^{-8}$      | $1.0 \times 10^{-12}$        |
| 340 | $3.5 \times 10^{13}$             | $6.2 \times 10^{12}$          | $7.3 \times 10^{17}$ | $1.2 \times 10^{-5}$ | $6.2 \times 10^{-8}$      | $7.2 \times 10^{-13}$        |
| 360 | $5.5 \times 10^{13}$             | $9.0 \times 10^{12}$          | $1.7 \times 10^{18}$ | $7.4 \times 10^{-6}$ | $7.4 \times 10^{-8}$      | $5.4 \times 10^{-13}$        |
| 380 | $8.6 \times 10^{13}$             | $1.3 \times 10^{13}$          | $3.8 \times 10^{18}$ | $5.0 \times 10^{-6}$ | $8.6 \times 10^{-8}$      | $4.2 \times 10^{-13}$        |
| 400 | $1.3 \times 10^{14}$             | $1.8 \times 10^{13}$          | $8.3 \times 10^{18}$ | $3.5 \times 10^{-6}$ | $9.8 \times 10^{-8}$      | $3.4 \times 10^{-13}$        |

The corresponding sentences have been added in the page 9 line 219-237 of the revised manuscript in blue color:

*As shown in Figure 5, the CH<sub>2</sub>OO + HO-CH<sub>2</sub>OO-H (Pa<sub>1</sub>) reaction proceeds according to a two-step mechanism: (i) a fast thermal equilibrium between the reactants and intermediate IM1a, (ii) the addition of CH<sub>2</sub>OO leading to the formation of product P1a. The whole reaction process is expressed as follows:*

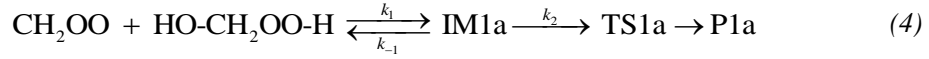

Applying the steady state approximation (SSA) for the intermediate IM1a, the overall rate coefficient is extrapolated to the eqn (5) (Zhang et al., 2012; Liu et al., 2015)

$$k_{\text{ovr}} = \frac{k_1 \times k_2}{k_{-1} + k_2} \quad (5)$$

If  $k_2 \ll k_{-1}$ , the overall rate coefficient is written as follows: (Chen et al., 2016b; Ryzhkov et al., 2006)

$$k_{\text{ovr}} = \frac{k_1 \times k_2}{k_{-1} + k_2} \approx \frac{k_1}{k_{-1}} k_2 = K_{\text{eq}} k_2 \quad (6)$$

The equilibrium coefficient  $K_{\text{eq}}$  is expressed as eqn (7):

$$K_{\text{eq}} = \sigma \frac{Q_{\text{IM}}(T)}{Q_{\text{A}}(T)Q_{\text{B}}(T)} \exp\left(\frac{G_{\text{R}} - G_{\text{IM}}}{RT}\right) \quad (7)$$

where  $\sigma$  is reaction symmetry number,  $Q_{\text{IM}}(T)$ ,  $Q_{\text{A}}(T)$  and  $Q_{\text{B}}(T)$  denote the products of electronic, translational, rotational, torsional, and vibrational canonical partition functions for the intermediate, reactants A and B, respectively (Mendes et al., 2014),  $T$  is the temperature in Kelvin,  $G_{\text{R}}$  and  $G_{\text{IM}}$  are the total free-energies of the reactant and complex, respectively.

6. The authors report rate constants for the reactions of the carbonyl oxides considered with HHP's (Table 2), but no mention is done for the reactions of P1x with Carbonyl oxides. Moreover, that authors should clarify if they have considered all different conformers of the stationary points in the kinetic study. In addition, they should estimate the errors in the these calculated rate constants, since they can be between one and two orders of magnitude according to the errors in the computed free energy barriers.

**Response:** Based on the Reviewer's suggestion, the rate coefficients of carbonyl oxides reactions with P1x, P3x, P5x, and P7x are calculated using a combination of canonical transition state theory (CTST) and an asymmetric Eckart tunneling correction at 273-400 K. And the different conformers of stationary points in the kinetics study are taken into account, with the obtained results listed in Table S5-S8. As shown in Table S5, the predicted rate coefficients for the reaction of  $\text{CH}_2\text{OO}$  with P1a decrease with increasing temperature, with a similar trend observed for  $\text{CH}_2\text{OO} + \text{P1b}$ ,  $\text{CH}_2\text{OO} + \text{P1c}$  and  $\text{CH}_2\text{OO} + \text{P1d}$  systems. The result implies that the oligomer

formation from CH<sub>2</sub>OO reaction with HHP is preferable under low temperature conditions. Similar conclusions are obtained from the *anti*-CH<sub>3</sub>CHOO + P3x (Table S6), *syn*-CH<sub>3</sub>CHOO + P5x (Table S7) and (CH<sub>3</sub>)<sub>2</sub>CHOO + P7x (Table S8) systems. In order to avoid redundancy, we do not repeat them here in detail. Considering the errors of the computed free energy barriers, the uncertainty of rate coefficient is estimated within an order of magnitude.

Corresponding descriptions have been added in the page 18 line 500-506 and page 19 line 521-528 of the revised manuscript:

*the rate coefficients of distinct SCI reactions with HO-CH<sub>2</sub>OO-H (Pa<sub>1</sub>) are computed using a combination of canonical transition state theory (CTST) and an asymmetric Eckart tunneling correction based on the free energies obtained at the M06-2X level, in the temperature range from 273 to 400 K. And the different conformers of stationary points in the kinetics study are taken into account, with the results listed in Table 2 and Table S5-S8.*

*As shown in Table S5, the rate coefficients of CH<sub>2</sub>OO + P1a, CH<sub>2</sub>OO + P1b, CH<sub>2</sub>OO + P1c and CH<sub>2</sub>OO + P1d reactions decrease with increasing temperature, indicating that the oligomer formation from CH<sub>2</sub>OO reactions with HHP is preferable under low temperature conditions. Similar conclusions are also obtained from the *anti*-CH<sub>3</sub>CHOO + P3x (Table S6), *syn*-CH<sub>3</sub>CHOO + P5x (Table S7) and (CH<sub>3</sub>)<sub>2</sub>CHOO + P7x (Table S8) systems. In order to avoid redundancy, we do not repeat them here in detail. Considering the errors of the computed free energy barriers, the uncertainty of rate coefficient is estimated within an order of magnitude.*

**Table S5** Rate coefficients (cm<sup>3</sup> molecule<sup>-1</sup> s<sup>-1</sup>) of CH<sub>2</sub>OO reactions with P1a, P1b, P1c and P1d computed at different temperatures

| <i>T/K</i> | <i>k</i> <sub>(CH<sub>2</sub>OO+P1a)</sub> | <i>k</i> <sub>(CH<sub>2</sub>OO+P1b)</sub> | <i>k</i> <sub>(CH<sub>2</sub>OO+P1c)</sub> | <i>k</i> <sub>(CH<sub>2</sub>OO+P1d)</sub> |
|------------|--------------------------------------------|--------------------------------------------|--------------------------------------------|--------------------------------------------|
| 273        | $5.1 \times 10^{-12}$                      | $3.5 \times 10^{-12}$                      | $8.2 \times 10^{-13}$                      | $4.8 \times 10^{-11}$                      |
| 280        | $4.0 \times 10^{-12}$                      | $2.9 \times 10^{-12}$                      | $7.1 \times 10^{-13}$                      | $3.7 \times 10^{-11}$                      |
| 298        | $2.3 \times 10^{-12}$                      | $1.9 \times 10^{-12}$                      | $5.2 \times 10^{-13}$                      | $1.9 \times 10^{-11}$                      |
| 300        | $2.2 \times 10^{-12}$                      | $1.8 \times 10^{-12}$                      | $5.0 \times 10^{-13}$                      | $1.8 \times 10^{-11}$                      |
| 320        | $1.3 \times 10^{-12}$                      | $1.2 \times 10^{-12}$                      | $3.7 \times 10^{-13}$                      | $1.0 \times 10^{-11}$                      |
| 340        | $8.3 \times 10^{-13}$                      | $8.5 \times 10^{-13}$                      | $2.8 \times 10^{-13}$                      | $5.9 \times 10^{-12}$                      |
| 360        | $5.6 \times 10^{-13}$                      | $6.3 \times 10^{-13}$                      | $2.3 \times 10^{-13}$                      | $3.8 \times 10^{-12}$                      |
| 380        | $4.0 \times 10^{-13}$                      | $4.9 \times 10^{-13}$                      | $1.9 \times 10^{-13}$                      | $2.5 \times 10^{-12}$                      |
| 400        | $3.0 \times 10^{-13}$                      | $3.9 \times 10^{-13}$                      | $1.6 \times 10^{-13}$                      | $1.8 \times 10^{-12}$                      |

**Table S6** Rate coefficients ( $\text{cm}^3 \text{ molecule}^{-1} \text{ s}^{-1}$ ) of anti- $\text{CH}_3\text{CHOO}$  reactions with P3a, P3b, P3c and P3d computed at different temperatures

| $T/\text{K}$ | $k_{(\text{anti}+\text{P3a})}$ | $k_{(\text{anti}+\text{P3b})}$ | $k_{(\text{anti}+\text{P3c})}$ | $k_{(\text{anti}+\text{P3d})}$ |
|--------------|--------------------------------|--------------------------------|--------------------------------|--------------------------------|
| 273          | $3.5 \times 10^{-9}$           | $2.3 \times 10^{-9}$           | $1.7 \times 10^{-7}$           | $2.1 \times 10^{-9}$           |
| 280          | $2.3 \times 10^{-9}$           | $1.4 \times 10^{-9}$           | $1.0 \times 10^{-7}$           | $1.4 \times 10^{-9}$           |
| 298          | $8.8 \times 10^{-10}$          | $5.8 \times 10^{-10}$          | $2.9 \times 10^{-8}$           | $5.9 \times 10^{-10}$          |
| 300          | $8.0 \times 10^{-10}$          | $5.3 \times 10^{-10}$          | $2.6 \times 10^{-8}$           | $5.4 \times 10^{-10}$          |
| 320          | $3.2 \times 10^{-10}$          | $2.3 \times 10^{-10}$          | $7.9 \times 10^{-9}$           | $2.3 \times 10^{-10}$          |
| 340          | $1.4 \times 10^{-10}$          | $1.1 \times 10^{-10}$          | $2.8 \times 10^{-9}$           | $1.1 \times 10^{-10}$          |
| 360          | $7.1 \times 10^{-11}$          | $5.8 \times 10^{-11}$          | $1.1 \times 10^{-9}$           | $5.9 \times 10^{-11}$          |
| 380          | $3.8 \times 10^{-11}$          | $3.3 \times 10^{-11}$          | $4.9 \times 10^{-10}$          | $3.4 \times 10^{-11}$          |
| 400          | $2.2 \times 10^{-11}$          | $2.0 \times 10^{-11}$          | $2.4 \times 10^{-10}$          | $2.0 \times 10^{-11}$          |

**Table S7** Rate coefficients ( $\text{cm}^3 \text{ molecule}^{-1} \text{ s}^{-1}$ ) of syn- $\text{CH}_3\text{CHOO}$  reactions with P5a, P5b, P5c and P5d computed at different temperatures

| $T/\text{K}$ | $k_{(\text{syn}+\text{P5a})}$ | $k_{(\text{syn}+\text{P5b})}$ | $k_{(\text{syn}+\text{P5c})}$ | $k_{(\text{syn}+\text{P5d})}$ |
|--------------|-------------------------------|-------------------------------|-------------------------------|-------------------------------|
| 273          | $2.1 \times 10^{-11}$         | $1.7 \times 10^{-13}$         | $2.1 \times 10^{-11}$         | $2.4 \times 10^{-13}$         |
| 280          | $1.5 \times 10^{-11}$         | $1.4 \times 10^{-13}$         | $1.5 \times 10^{-11}$         | $2.0 \times 10^{-13}$         |
| 298          | $7.5 \times 10^{-12}$         | $1.0 \times 10^{-13}$         | $7.6 \times 10^{-12}$         | $1.4 \times 10^{-13}$         |
| 300          | $6.9 \times 10^{-12}$         | $9.7 \times 10^{-14}$         | $7.0 \times 10^{-12}$         | $1.4 \times 10^{-13}$         |
| 320          | $3.5 \times 10^{-12}$         | $6.9 \times 10^{-14}$         | $3.6 \times 10^{-12}$         | $9.6 \times 10^{-14}$         |
| 340          | $1.9 \times 10^{-12}$         | $5.2 \times 10^{-14}$         | $2.0 \times 10^{-12}$         | $7.1 \times 10^{-14}$         |
| 360          | $1.1 \times 10^{-12}$         | $4.0 \times 10^{-14}$         | $1.2 \times 10^{-12}$         | $5.5 \times 10^{-14}$         |
| 380          | $7.1 \times 10^{-13}$         | $3.0 \times 10^{-14}$         | $7.3 \times 10^{-13}$         | $4.4 \times 10^{-14}$         |
| 400          | $4.7 \times 10^{-13}$         | $2.6 \times 10^{-14}$         | $4.9 \times 10^{-13}$         | $3.6 \times 10^{-14}$         |

**Table S8** Rate coefficients ( $\text{cm}^3 \text{ molecule}^{-1} \text{ s}^{-1}$ ) of  $(\text{CH}_3)_2\text{CHOO}$  reactions with P7a, P7b, P7c and P7d computed at different temperatures

| $T/\text{K}$ | $k_{((\text{CH}_3)_2\text{CHOO}+\text{P7a})}$ | $k_{((\text{CH}_3)_2\text{CHOO}+\text{P7b})}$ | $k_{((\text{CH}_3)_2\text{CHOO}+\text{P7c})}$ | $k_{((\text{CH}_3)_2\text{CHOO}+\text{P7d})}$ |
|--------------|-----------------------------------------------|-----------------------------------------------|-----------------------------------------------|-----------------------------------------------|
| 273          | $7.8 \times 10^{-14}$                         | $9.1 \times 10^{-14}$                         | $1.8 \times 10^{-12}$                         | $4.5 \times 10^{-13}$                         |
| 280          | $6.8 \times 10^{-14}$                         | $8.2 \times 10^{-14}$                         | $1.5 \times 10^{-12}$                         | $3.9 \times 10^{-13}$                         |
| 298          | $5.0 \times 10^{-14}$                         | $6.6 \times 10^{-14}$                         | $1.0 \times 10^{-12}$                         | $2.8 \times 10^{-13}$                         |
| 300          | $4.8 \times 10^{-14}$                         | $6.5 \times 10^{-14}$                         | $9.9 \times 10^{-13}$                         | $2.7 \times 10^{-13}$                         |
| 320          | $3.6 \times 10^{-14}$                         | $5.3 \times 10^{-14}$                         | $6.9 \times 10^{-13}$                         | $1.9 \times 10^{-13}$                         |
| 340          | $2.8 \times 10^{-14}$                         | $4.5 \times 10^{-14}$                         | $5.1 \times 10^{-13}$                         | $1.5 \times 10^{-13}$                         |
| 360          | $2.2 \times 10^{-14}$                         | $3.9 \times 10^{-14}$                         | $3.9 \times 10^{-13}$                         | $1.2 \times 10^{-13}$                         |

|     |                       |                       |                       |                       |
|-----|-----------------------|-----------------------|-----------------------|-----------------------|
| 380 | $1.9 \times 10^{-14}$ | $3.5 \times 10^{-14}$ | $3.1 \times 10^{-13}$ | $9.6 \times 10^{-14}$ |
| 400 | $1.6 \times 10^{-14}$ | $3.1 \times 10^{-14}$ | $2.5 \times 10^{-13}$ | $8.0 \times 10^{-14}$ |

7. With respect to the atmospheric implications, the authors compare the reaction rates of the reaction investigated with those between carbonyl oxides with formic acid. In my opinion, the reactions rates of carbonyl oxides with water and water dimer, but also the reactions rates of HHPs with water should be also taken into account, because the high concentration of water vapor in the atmosphere. For the last, there are free energy barriers in the literature to compare with.

**Response:** As shown in Table 2, the rate coefficient of *anti*-CH<sub>3</sub>CHOO + Pa<sub>1</sub> reaction (R9) is significantly higher than that of the other three pathways (R1a, R10 and R11). Therefore, it would be interesting to investigate whether the *anti*-CH<sub>3</sub>CHOO + Pa<sub>1</sub> reaction can compete well with the *anti*-CH<sub>3</sub>CHOO + (H<sub>2</sub>O)<sub>2</sub> (R12) system because the latter reaction is the dominant chemical sink (Anglada et al., 2016; Taatjes, et al., 2013). The ratio of reaction rates of R9 and R12 is expressed as follows

$$\frac{\nu_{R9}}{\nu_{R12}} = \frac{k_{R9}[CI][Pa_1]}{k_{R12}[CI][(H_2O)_2]} = \frac{k_{R9}[Pa_1]}{k_{R12}[(H_2O)_2]} \quad (9)$$

The room temperature rate coefficient  $k_{R9}$  is  $1.5 \times 10^{-9} \text{ cm}^3 \text{ molecule}^{-1} \text{ s}^{-1}$ . Assuming that the concentration of Pa<sub>1</sub> is approximately equal to that of SCIs ( $\sim 5.0 \times 10^4 \text{ molecules cm}^{-3}$ , within an order of magnitude uncertainty) in the boreal forest and rural environments of Finland and Germany (Novelli et al, 2016, 2017). The atmospheric lifetime of *anti*-CH<sub>3</sub>CHOO reactivity toward Pa<sub>1</sub> can be estimated as  $1.3\text{-}13 \times 10^3 \text{ s}$ . The experimental rate coefficient of reaction R12 approximately equals  $\sim 1.0 \times 10^{-11} \text{ cm}^3 \text{ molecule}^{-1} \text{ s}^{-1}$  at 298 K (Lin et al., 2016). The concentration of water dimer is  $5.5 \times 10^{13} \text{ molecules cm}^{-3}$  at 3 km altitude (Long et al., 2016). The  $\nu_{R9}/\nu_{R12}$  ratio is less than 1.4%, meaning that the *anti*-CH<sub>3</sub>CHOO + Pa<sub>1</sub> reaction is minor loss process in the atmosphere. However, the [(H<sub>2</sub>O)<sub>2</sub>] is very low at the altitude above 15 km ( $< 2.7 \times 10^6 \text{ molecules cm}^{-3}$ ) (Long et al., 2016), the *anti*-CH<sub>3</sub>CHOO + Pa<sub>1</sub> reaction can compete well with the *anti*-CH<sub>3</sub>CHOO + (H<sub>2</sub>O)<sub>2</sub> reaction, and thus contribute to the formation and growth of SOA. `

Kumar et al. (2014) proposed that the gas-phase decomposition of Pa<sub>1</sub> has two competitive pathways, namely (i) HO-CH<sub>2</sub>OO-H  $\rightarrow$  CH<sub>2</sub>O + H<sub>2</sub>O<sub>2</sub> and (ii) HO-CH<sub>2</sub>OO-H  $\rightarrow$  HCOOH + H<sub>2</sub>O. The free energy barriers  $\Delta G_a^\#$  in the presence of a single water molecule are 31.2 and 47.8 kcal mol<sup>-1</sup>, respectively, which are 13.5 and 10.2 kcal mol<sup>-1</sup> lower than the uncatalyzed reactions.

The result reveals that the formaldehyde-forming channel is preferable in the absence and presence of water molecule, and the role of water catalysis on the gas-phase  $\text{Pa}_1$  decomposition is significant. The  $\Delta G_a^\#$  of bimolecular reaction of *anti*- $\text{CH}_3\text{CHOO}$  with  $\text{Pa}_1$  is  $7.3 \text{ kcal mol}^{-1}$ , which is  $23.9 \text{ kcal mol}^{-1}$  lower than the formaldehyde-forming channel. It is concluded that the  $\text{Pa}_1 + \text{H}_2\text{O}$  reaction is less competitive as compared to the *anti*- $\text{CH}_3\text{CHOO} + \text{Pa}_1$  system.

Corresponding descriptions have been added in the page 20 line 542-556, page 20 line 565 and page 21 line 566-579 of the revised manuscript:

*As discussed above, the anti-CH<sub>3</sub>CHOO + HO-CH<sub>2</sub>OO-H (Pa<sub>1</sub>) reaction (R9) is preferred over the other three pathways (R1a, R10 and R11). Therefore, it would be interesting to investigate whether the anti-CH<sub>3</sub>CHOO + Pa<sub>1</sub> reaction can compete well with the anti-CH<sub>3</sub>CHOO + (H<sub>2</sub>O)<sub>2</sub> (R12) system because the latter reaction is the dominant chemical sink (Taatjes et al., 2013; Anglada et al., 2016). The ratio of reaction rates of R9 and R12 is expressed as follows*

$$\frac{\nu_{\text{R9}}}{\nu_{\text{R12}}} = \frac{k_{\text{R9}}[\text{Cl}][\text{Pa}_1]}{k_{\text{R12}}[\text{Cl}][(\text{H}_2\text{O})_2]} = \frac{k_{\text{R9}}[\text{Pa}_1]}{k_{\text{R12}}[(\text{H}_2\text{O})_2]} \quad (10)$$

*The room temperature rate coefficient  $k_{\text{R9}}$  is  $1.5 \times 10^{-9} \text{ cm}^3 \text{ molecule}^{-1} \text{ s}^{-1}$ . Assuming that the concentration of  $\text{Pa}_1$  is approximately equal to that of SCIs ( $\sim 5.0 \times 10^4 \text{ molecules cm}^{-3}$ , within an order of magnitude uncertainty) in the boreal forest and rural environments of Finland and Germany (Novelli et al., 2016; 2017). The atmospheric lifetime of *anti*- $\text{CH}_3\text{CHOO}$  reactivity toward  $\text{Pa}_1$  can be estimated as  $1.3\text{--}13 \times 10^3 \text{ s}$ . The experimental rate coefficient of reaction R12 approximately equals  $\sim 1.0 \times 10^{-11} \text{ cm}^3 \text{ molecule}^{-1} \text{ s}^{-1}$  at 298 K (Lin et al., 2016). The concentration of water dimer is  $5.5 \times 10^{13} \text{ molecules cm}^{-3}$  at 3 km altitude (Long et al., 2016).*

*The  $\nu_{\text{R9}}/\nu_{\text{R12}}$  ratio is less than 1.4% when the  $[(\text{H}_2\text{O})_2]$  is  $\sim 10^{13} \text{ molecules cm}^{-3}$ , meaning that the *anti*- $\text{CH}_3\text{CHOO} + \text{Pa}_1$  reaction is minor loss process in the atmosphere. However, the  $[(\text{H}_2\text{O})_2]$  is very low at the altitude above 15 km, the *anti*- $\text{CH}_3\text{CHOO} + \text{Pa}_1$  reaction can compete well with the *anti*- $\text{CH}_3\text{CHOO} + (\text{H}_2\text{O})_2$  reaction, and thus contribute to the formation and growth of SOA. Kumar et al. (2014) proposed that the gas-phase decomposition of  $\text{Pa}_1$  has two competitive pathways: (i)  $\text{HO-CH}_2\text{OO-H} \rightarrow \text{CH}_2\text{O} + \text{H}_2\text{O}_2$  and (ii)  $\text{HO-CH}_2\text{OO-H} \rightarrow \text{HCOOH} + \text{H}_2\text{O}$ . The  $\Delta G_a^\#$  in the presence of a single water molecular are 31.2 and 47.8  $\text{kcal mol}^{-1}$ , respectively, which are 13.5 and 10.2  $\text{kcal mol}^{-1}$  lower than the uncatalyzed reactions. The result reveals that the formaldehyde-forming channel is preferable in the absence and presence of water molecule, and*

the role of water catalysis on the gas-phase decomposition of  $Pa_1$  is significant. The  $\Delta G_a^\#$  of bimolecular reaction of anti- $CH_3CHOO$  with  $Pa_1$  is  $7.3 \text{ kcal mol}^{-1}$ , which is  $23.9 \text{ kcal mol}^{-1}$  lower than the formaldehyde-forming channel. It is concluded that the  $Pa_1 + H_2O$  reaction is less competitive as compared to the anti- $CH_3CHOO + Pa_1$  system.

8. An hydrogen misses in the structure of P1a in Figure 2. In addition some addition structures of the P2x compounds should be drawn if the different figures and the numbers should have a larger size.

**Response:** Based on the Reviewer's suggestion, the PES of  $CH_2OO$  reaction with  $HO-CH_2OO-H$  ( $Pa_1$ ) is redrawn in Figure 2, and the str in the Figure 2.

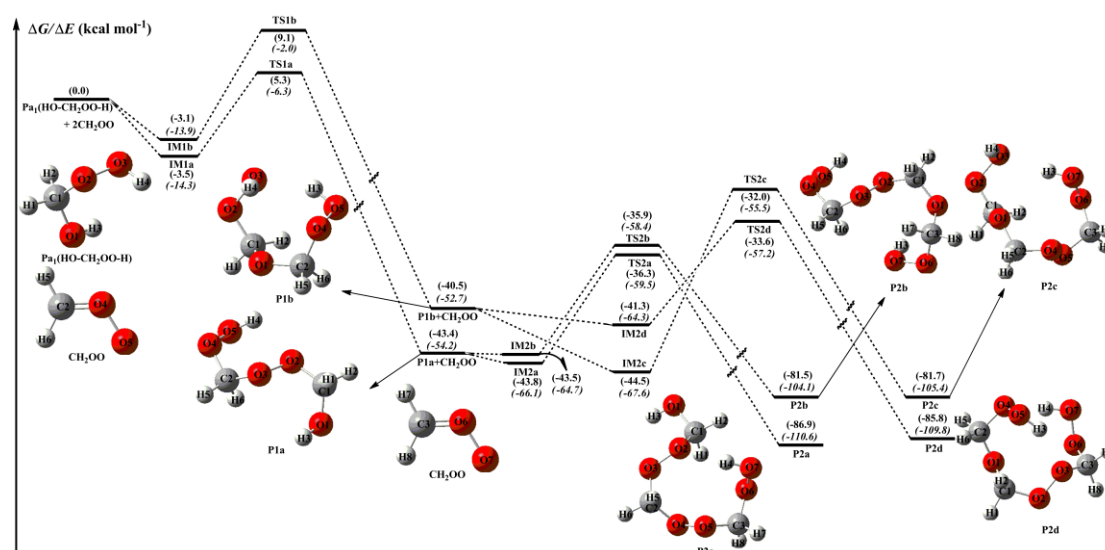

**Figure 2.** PES ( $\Delta G$  and  $\Delta E$  (*italic*)) for the reaction of  $CH_2OO$  with  $HO-CH_2OO-H$  ( $Pa_1$ ) computed at the M06-2X/def2-TZVP//M06-2X/6-311+G(2df,2p) level of theory



## References

- Anglada, J. M., and Solé A.: Impact of water dimer on the atmospheric reactivity of carbonyl oxides, *Phys. Chem. Chem. Phys.*, 18, 17698-17712, 10.1039/c6cp02531e, 2016.
- Boys, S. F., and Bernardi, F.: The calculation of small molecular interactions by the differences of separate total energies. Some procedures with reduced errors, *Mol. Phys.*, 19, 553-566, 10.1080/00268977000101561, 1970.
- Chen, L., Wang, W. L., Zhou, L. T., Wang, W. N., Liu, F. Y., Li, C. Y., and Lü, J.: Role of water clusters in the reaction of the simplest Criegee intermediate  $\text{CH}_2\text{OO}$  with water vapour, *Theor. Chem. Acc.*, 135, 252-263, 10.1007/s00214-016-1998-2, 2016.
- Kumar, M., Busch, D. H., Subramaniam, B., and Thompson, W. H.: Role of tunable acid catalysis in decomposition of  $\alpha$ -hydroxyalkyl hydroperoxides and mechanistic implications for tropospheric chemistry, *J. Phys. Chem. A*, 118, 9701-9711, 10.1021/jp505100x, 2014.
- Lin, L. C., Chang, H. T., Chang, C. H., Chao, W., Smith, M. C., Chang, C. H., Lin, J. J. M., and Takahashi, K.: Competition between  $\text{H}_2\text{O}$  and  $(\text{H}_2\text{O})_2$  reactions with  $\text{CH}_2\text{OO}/\text{CH}_3\text{CHOO}$ , *Phys. Chem. Chem. Phys.*, 18, 4557-4568, 10.1039/C5CP06446E, 2016.
- Liu, J., Fang, S., Wang, Z., Yi, W., Tao, F. M., and Liu, J. Y.: Hydrolysis of sulfur dioxide in small clusters of sulfuric acid: mechanistic and kinetic study, *Environ. Sci. Technol.*, 49, 13112-13120, 10.1021/acs.est.5b02977, 2015
- Long, B., Bao, J. L., and Truhlar, D. G.: Atmospheric chemistry of Criegee intermediates: unimolecular reactions and reactions with water, *J. Am. Chem. Soc.*, 138, 14409-14422, 10.1021/jacs.6b08655, 2016.
- Mendes, J., Zhou, C. W., and Curran, H. J.: Theoretical chemical kinetic study of the H-atom abstraction reactions from aldehydes and acids by H atoms and OH,  $\text{HO}_2$ , and  $\text{CH}_3$  radicals, *J. Phys. Chem. A*, 118, 12089-12104, 10.1021/jp5072814, 2014.
- Novelli, A., Hens, K., Ernest, C. T., Martinez, M., Nölscher, A. C., Sinha, V., Paasonen, P., Petäjä, T., Sipilä, M., Elste, T., Plass-Dülmer, C., Phillips, G. J., Kubistin, D., Williams, J., Vereecken, L., Lelieveld, J., and Harder, H.: Identifying Criegee intermediates as potential oxidants in the troposphere, *Atmos. Chem. Phys. Discuss.*, 10.5194/acp-2016-919, 2016.
- Novelli, A., Hens, K., Ernest, C. T., Martinez, M., Nölscher, A. C., Sinha, V., Paasonen, P., Petäjä, T., Sipilä, M., Elste, T., Plass-Dülmer, C., Phillips, G. J., Kubistin, D., Williams, J.,

- Vereecken, L., Lelieveld, J., and Harder, H.: Estimating the atmospheric concentration of Criegee intermediates and their possible interference in a FAGE-LIF instrument, *Atmos. Chem. Phys.*, 17, 7807-7826, 10.5194/acp-17-7807-2017, 2017.
- Ryzhkov, A. B., and Ariya, P. A.: The importance of water clusters  $(\text{H}_2\text{O})_n$  ( $n=2, \dots, 4$ ) in the reaction of Criegee intermediate with water in the atmosphere, *Chem. Phys. Lett.*, 419, 479-485, 10.1016/j.cplett.2005.12.016, 2006.
- Taatjes, C. A., Welz, O., Eskola, A. J., Savee, J. D., Scheer, A. M., Shallcross, D. E., Rotavera, B., Lee, E. P. F., Dyke, J. M., Mok, D. K. W., Osborn, D. L., and Percival, C. J.: Direct measurements of conformer-dependent reactivity of the Criegee intermediate  $\text{CH}_3\text{CHOO}$ , *Science*, 340, 177-180, 10.1126/science.1234689, 2013.
- Zhang, P., Wang, W. L., Zhang, T. L., Chen, L., Du, Y. M., Li, C. Y., and Lü, J.: Theoretical study on the mechanism and kinetics for the self-reaction of  $\text{C}_2\text{H}_5\text{O}_2$  radicals, *J. Phys. Chem. A*, 116, 4610-4620, 10.1021/jp301308u, 2012.
